# Supplementary material for: Small RNAs in the Genus Clostridium
Source: PubMed Central journal article supplement — mBio. 2011 Jan 25;2(1):e00340-10. doi: 10.1128/mBio.00340-10 (PMC3025663; doi:10.1128/mbio.00340-10), 2011-01-25
Supplement: mBio00340-10-st03.pdf [file mBio00340-10-st03.pdf]

**Table S3 - Summary of predicted sRNAs in *C. acetobutylicum* ATCC 824**

| Candidate                                                               | Position                         | Left Gene | Orientation        | Right Gene | Classification (Probability)            | Validation                       |
|-------------------------------------------------------------------------|----------------------------------|-----------|--------------------|------------|-----------------------------------------|----------------------------------|
| <b><i>C. acetobutylicum</i> ATCC 824 chromosome (NC_003030)</b>         |                                  |           |                    |            |                                         |                                  |
| sCAC137                                                                 | 136025-136338                    | tRNA      | → ⇨ <sup>Ⓞ</sup> → | CAC0125    | <i>SRP_bact</i> <sup>†</sup> (0.50)     | Q <sup>++</sup> , N <sup>+</sup> |
| sCAC349                                                                 | 348527-348978                    | CAC0292   | → ⇨ <sup>Ⓞ</sup> ← | CAC0293    | <i>Intron_gpI</i> (0.55)                | Q                                |
| sCAC500                                                                 | 499444-499798                    | CAC0431   | ← ⇨ <sup>Ⓞ</sup> → | CAC0432    | <i>SSU rRNA</i> (0.52)                  | Q                                |
| sCAC610 <sup>*</sup>                                                    | 609479-609707<br>(609492-609714) | CAC0527   | → ⇨ <sup>Ⓞ</sup> → | CAC0528    | NC                                      | Q <sup>+</sup> , N <sup>+</sup>  |
| sCAC646 <sup>§</sup>                                                    | 645484-645836                    | CAC0557   | → ⇨ <sup>Ⓞ</sup> → | CAC0558    | <i>SRP_euk_arch</i> <sup>§</sup> (0.51) | Q <sup>+</sup> , N               |
| sCAC903                                                                 | 902756-903083                    | CAC0779   | ← ⇨ <sup>Ⓞ</sup> → | CAC0780    | <i>T-box</i> (0.52)                     | Q <sup>+</sup>                   |
| sCAC975.1                                                               | 974783-975194                    | CAC0846   | → ⇨ <sup>Ⓞ</sup> ← | CAC0847    | NC                                      | Q <sup>+</sup>                   |
| sCAC1132                                                                | 1131472-1131688                  | CAC0983   | → ⇨ <sup>Ⓞ</sup> → | CAC0984    | <i>Riboswitch</i> (0.55)                | Q <sup>+</sup>                   |
| sCAC1313                                                                | 1312583-1312896                  | CAC1143   | ← ⇨ <sup>Ⓞ</sup> → | CAC1145    | NC                                      | Q                                |
| sCAC1315                                                                | 1314535-1314900                  | CAC1145   | → ⇨ <sup>Ⓞ</sup> → | CAC1146    | NC                                      | Q <sup>+</sup>                   |
| sCAC1449                                                                | 1448520-1448657                  | CAC1304   | → ⇨ <sup>Ⓞ</sup> → | CAC1305    | <i>RNaseP_bact</i> <sup>†</sup> (0.52)  | Q <sup>++</sup> , N <sup>+</sup> |
| sCAC1582 <sup>§</sup>                                                   | 1581613-1581785                  | CAC1435   | → ⇨ <sup>Ⓞ</sup> → | CAC1436    | NC                                      | Q <sup>+</sup> , N               |
| sCAC1594                                                                | 1593590-1594108                  | CAC1445   | → ⇨ <sup>Ⓞ</sup> → | CAC1446    | <i>tmRNA</i> (0.5)                      | Q                                |
| sCAC1645                                                                | 1644571-1644836                  | CAC1500   | ← ⇨ <sup>Ⓞ</sup> → | CAC1501    | NC                                      | Q <sup>++</sup>                  |
| sCAC1760                                                                | 1759916-1760315                  | CAC1619   | → ⇨ <sup>Ⓞ</sup> → | CAC1620    | <i>tmRNA</i> (0.83)                     | Q <sup>+</sup> , N <sup>+</sup>  |
| sCAC2709                                                                | 2708590-2708940                  | CAC2603   | ← ⇨ <sup>Ⓞ</sup> → | CAC2605    | <i>SRP_euk_arch</i> (0.52)              | Q                                |
| sCAC2795                                                                | 2794525-2794683                  | CAC2675   | ← ⇨ <sup>Ⓞ</sup> ← | CAC2676    | <i>Intron_gpI</i> (0.51)                | Q <sup>+</sup>                   |
| sCAC2819.1                                                              | 2818349-2818570                  | CAC2695   | → ⇨ <sup>Ⓞ</sup> ← | CAC2696    | <i>SRP_euk_arch</i> (0.51)              | Q                                |
| sCAC3039                                                                | 3038094-3038615                  | CAC2903   | ← ⇨ <sup>Ⓞ</sup> ← | CAC2904    | NC                                      | Q                                |
| sCAC3283 <sup>§</sup>                                                   | 3282618-3282947                  | CAC3143   | ← ⇨ <sup>Ⓞ</sup> ← | CAC3145    | <i>SRP_euk_arch</i> <sup>§</sup> (0.52) | Q <sup>++</sup> , N              |
| sCAC3340                                                                | 3339706-3339933                  | CAC3194   | ← ⇨ <sup>Ⓞ</sup> ← | CAC3195    | <i>SRP_euk_arch</i> (0.51)              | Q <sup>+</sup> , N <sup>+</sup>  |
| sCAC3723                                                                | 3722148-3722252                  | CAC3524   | ← ⇨ <sup>Ⓞ</sup> ← | CAC3525    | NC                                      | Q <sup>+</sup>                   |
| sCAC3821                                                                | 3820221-3820568                  | CAC3616   | → ⇨ <sup>Ⓞ</sup> → | CAC3617    | <i>T-box</i> <sup>†</sup> (0.53)        | Q <sup>++</sup> , N <sup>+</sup> |
| sCAC3825                                                                | 3824134-3824236                  | CAC3621   | → ⇨ <sup>Ⓞ</sup> → | CAC3622    | <i>Riboswitch</i> (0.58)                | Q <sup>+</sup>                   |
| sCAC3850                                                                | 3849152-3849691                  | CAC3648   | ← ⇨ <sup>Ⓞ</sup> → | CAC3649    | <i>SRP_euk_arch</i> (0.50)              | Q                                |
| <b><i>C. acetobutylicum</i> ATCC 824 pSOL 1 megaplasmid (NC_001988)</b> |                                  |           |                    |            |                                         |                                  |
| sCA_P18                                                                 | 17253-17574                      | CA_P0016  | ← ⇨ <sup>Ⓞ</sup> ← | CA_P0017   | NC                                      | Q <sup>+</sup>                   |
| sCA_P18.1                                                               | 17550-17613                      | CA_P0016  | ← ⇨ <sup>Ⓞ</sup> ← | CA_P0017   | NC                                      | Q                                |
| sCA_P60 <sup>‡</sup>                                                    | 59763-60028                      | CA_P0058  | ← ⇨ <sup>Ⓞ</sup> ← | CA_P0059   | NC                                      | Q <sup>++</sup> , N              |
| sCA_P105                                                                | 104875-105129                    | CA_P0099  | ← ⇨ <sup>Ⓞ</sup> ← | CA_P0100   | <i>SRP_euk_arch</i> (0.63)              | Q                                |
| sCA_P176                                                                | 175194-175408                    | CA_P0161  | → ⇨ <sup>Ⓞ</sup> → | CA_P0162   | NC                                      | A                                |
| sCA_P189 <sup>‡</sup>                                                   | 188247-188754                    | CA_P0174  | → ⇨ <sup>Ⓞ</sup> ← | CA_P0175   | <i>SRP_euk_arch</i> (0.50)              | Q <sup>++</sup> , N              |

P : Promoter is found upstream of the sequence;

Ⓞ : Rho-independent terminator downstream of the sequence;

† The sRNA sequence is annotated in Rfam database;

\* The conserved clindamycin-related sRNA. The actual sequence position determined by RACE reaction is shown in the parentheses;

§ The expression was detected by Q-RT-PCR but not by Northern analysis;

‡ High expression by Q-RT-PCR was detected in some but not all RNA pools; in different RNA pools, no expression was detected by Northern analysis.

NC: cannot be classified with probability of at least 0.5;

Q : No expression detected by Q-RT-PCR;

Q<sup>+</sup>: lowly expressed sRNA detected by Q-RT-PCR;

Q<sup>++</sup>: highly expressed sRNA detected by Q-RT-PCR;

N : No expression detected by Northern analysis;

N<sup>+</sup> : sRNA validated by Northern analysis;

A: this was validated recently by Dr. P. Dürre's group (1)

1. **Schiel, B., N. Nold, and P. Dürre.** 2010. Identification of a small noncoding RNA in *Clostridium acetobutylicum*. *Biospektrum Special Issue 2010 (ISSN 0947-0867)*, Abstract GRV09. VAAM Annual Meeting 2010, March 28-31, Hanover, Germany:p. 135.
